# Supplementary material for: Is routine baseline brain imaging needed for all newly diagnosed non-small-cell lung cancer patients?
Source: Atypon-hosted journal article supplement (doi:10.2217/cer-2018-0148), 2019-05-22
Supplement: supplementary data.docx [file supplementary%20data.docx]

**SUPPLEMENTARY MATERIALS**

| **Supplementary Table 1. Recommendations for brain imaging according to NCCN NSCLC guidelines (all squamous cell carcinoma patients; T1-4 N0-3).** | | | |
| --- | --- | --- | --- |
|  | Reference: Brain metastases as shown on brain imaging | | NNI (1/PPV)  15.8 |
| Brain metastases  (2810 patients) | No brain metastases  (53334 patients) |
| Brain imaging recommended (41937 patients)* | TP  N= 2660 patients | FP  N= 39277 patients | PPV= TP/(TP+FP)  6.3% |
| Brain imaging not recommended  (14207 patients)* | FN  N= 150 patients | TN  N= 14057 patients | NPV= TN/(TN+FN)  98.9% |
|  | Sensitivity= TP/TP+FN  94.6% | Specificity= TN /FP+TN  26.3% | Accuracy (TN+TP/All)  29.7% |
| *Brain imaging not recommended: T1-T2a N0; Brain imaging recommended: all other patients.  FN: False negative; FP: False positive; NNI: Number needed to investigate; NPV: Negative predictive value; PPV: Positive predictive value; TN: True negative; TP: True positive. | | | |

| **Supplementary Table 2. Performance characteristics of NCCN recommendations for brain imaging according to different staging approaches of included patients (all patients).** | | | | |
| --- | --- | --- | --- | --- |
| **Histological category** | **Sensitivity** | **Specificity** | **PPV** | **NPV** |
| Clinically staging (131836 patients) | 92.6% | 18.1% | 16% | 93.6% |
| Pathological staging (29814 patients) | 73.4% | 61.4% | 2% | 99.5% |
| NPV: Negative predictive value; PPV: Positive predictive value. | | | | |

| **Supplementary Table 3. Modified NCCN recommendations for brain imaging among different categories of patients (including stage IIA T2b N0 among non-investigated patients).** | | | | | |
| --- | --- | --- | --- | --- | --- |
| **Histological category** | **Sensitivity** | **Specificity** | **PPV** | **NPV** | **Accuracy** |
| All patients | 90.3% | 33.5% | 14.1% | 96.6% | 31% |
| Adenocarcinoma | 89.6% | 37.5% | 17.4% | 96.1% | 34.1% |
| Squamous cell carcinoma | 92.8% | 29.4% | 6.5% | 98.7% | 28.3% |
| NPV: Negative predictive value; PPV: Positive predictive value. | | | | | |

| Supplementary Table 4. Modified NCCN recommendations for brain imaging among different categories of patients (including stage IIA/IIB among non-investigated patients). | | | | | |
| --- | --- | --- | --- | --- | --- |
| **Histological category** | **Sensitivity** | **Specificity** | **PPV** | **NPV** | **Accuracy** |
| All patients | 81.4% | 46.6% | 15.5% | 95.4% | 43.6% |
| Adenocarcinoma | 80.8% | 50.1% | 19.3% | 94.7% | 46.2% |
| Squamous cell carcinoma | 83.5% | 43.9% | 7.3% | 98.1% | 42.5% |
| NPV: Negative predictive value; PPV: Positive predictive value. | | | | | |
